# Supplementary material for: Interconnected MXene/Graphene Network Constructed by Soft Template for Multi-Performance Improvement of Polymer Composites
Source: PubMed Central journal article supplement (PMC9198158; doi:10.1007/s40820-022-00877-7), 2022-06-14
Supplement: 40820_2022_877_MOESM3_ESM.pdf [file 40820_2022_877_MOESM3_ESM.pdf]

Supporting Information for

## Interconnected MXene/Graphene Network Constructed by Soft Template for Multi-Performance Improvement of Polymer Composites

Liyuan Jin<sup>1</sup>, Wenjing Cao<sup>1</sup>, Pei Wang<sup>1</sup>, Na Song<sup>1</sup>, and Peng Ding<sup>1, \*</sup>

<sup>1</sup>Research Center of Nanoscience and Nanotechnology, College of Sciences, Shanghai University, 99 Shangda Road, Shanghai, 200444, P. R. China

\*Corresponding author. E-mail: [dingpeng@shu.edu.cn](mailto:dingpeng@shu.edu.cn) (Peng Ding)

### Supplementary Figures and Tables

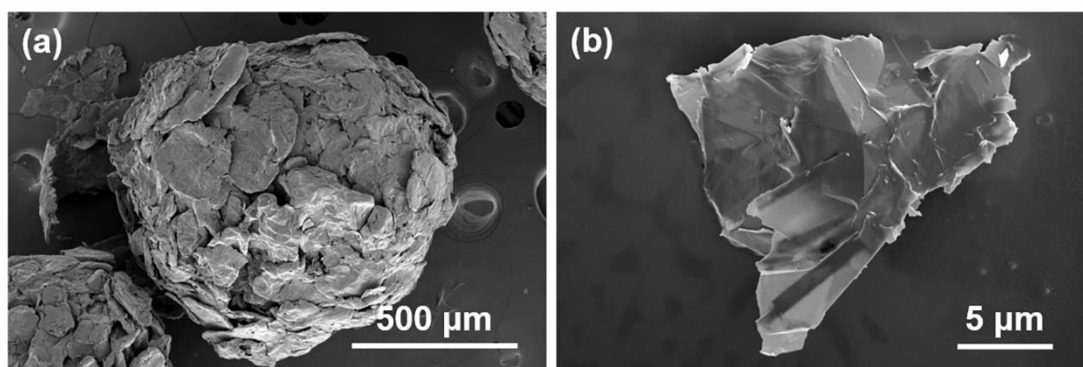

**Fig. S1** SEM images of (a) spherical-like graphene powder without ultrasonic dispersion and (b) Graphene sheets obtained after ultrasonic dispersion

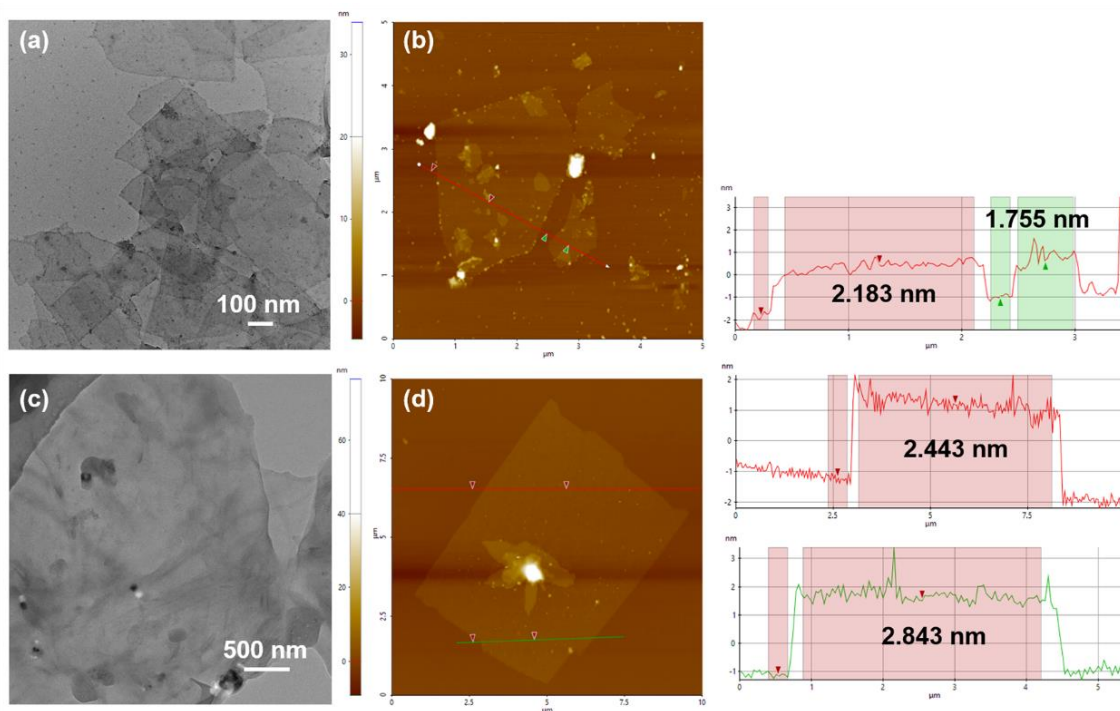

**Fig. S2** (a) TEM and (b) AFM images of MXene nanosheets. (c) TEM and (d) AFM images of graphene nanosheets

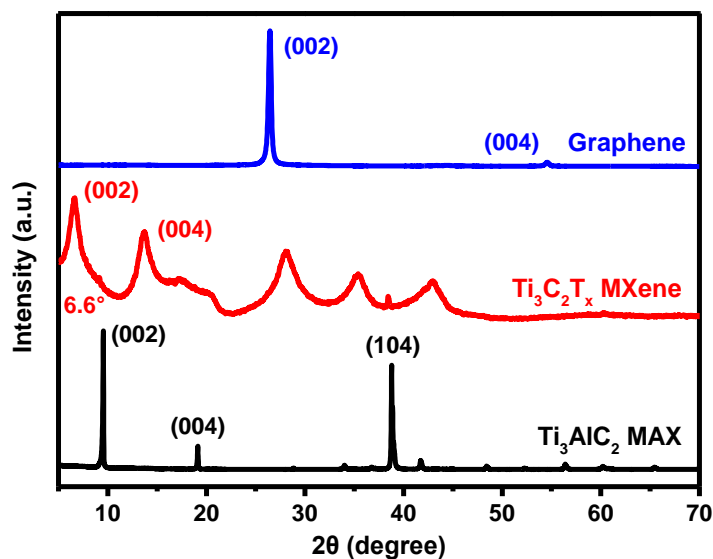

Fig. S3 XRD patterns of  $Ti_3AlC_2$  MAX,  $Ti_3C_2T_x$  MXene and graphene nanosheets

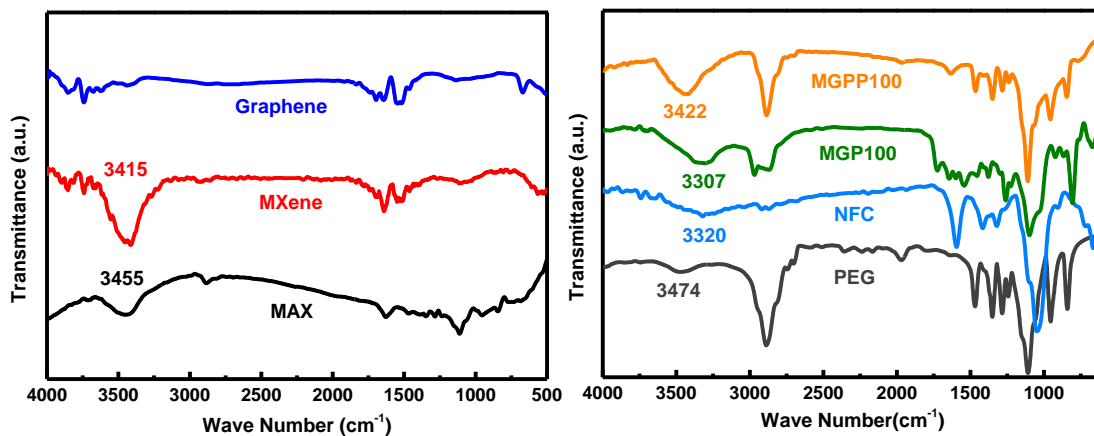

Fig. S4 FTIR spectra of  $Ti_3AlC_2$  MAX,  $Ti_3C_2T_x$  MXene, graphene, PEG, NFC, MG/NFC and MGPP100

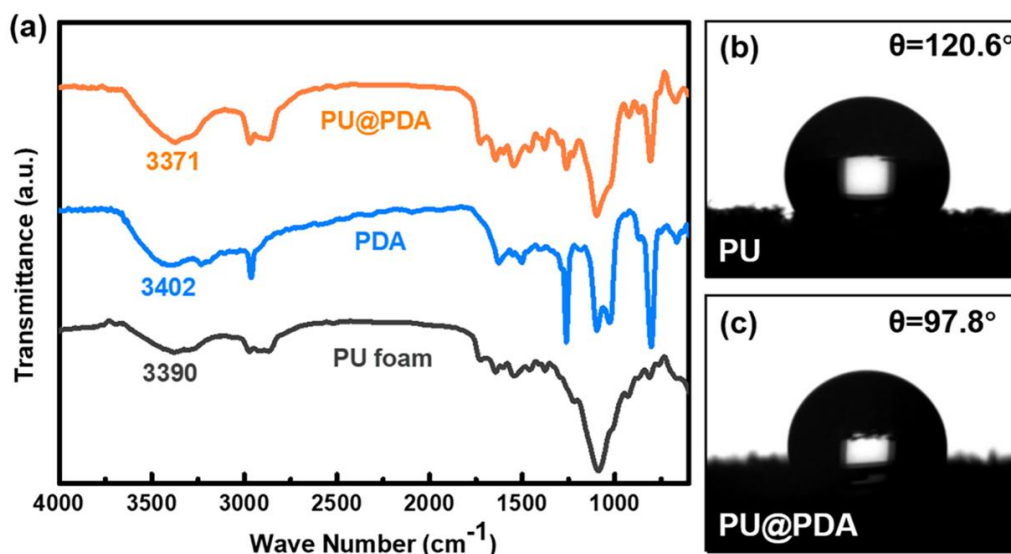

Fig. S5 (a) FTIR spectra of PU foam, PDA, and PU@PDA. Water contact angle (WCA) images of (b) PU and (c) PU@PDA

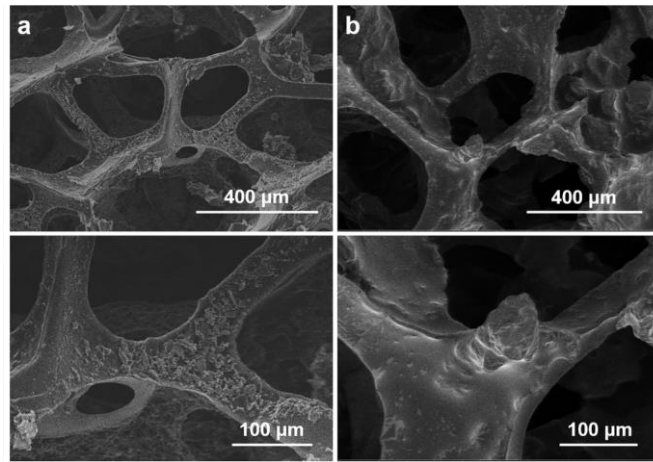

**Fig. S6** SEM images of MGP composite foams with (a) PVA solution and (b) NFC solution and their corresponding magnification images

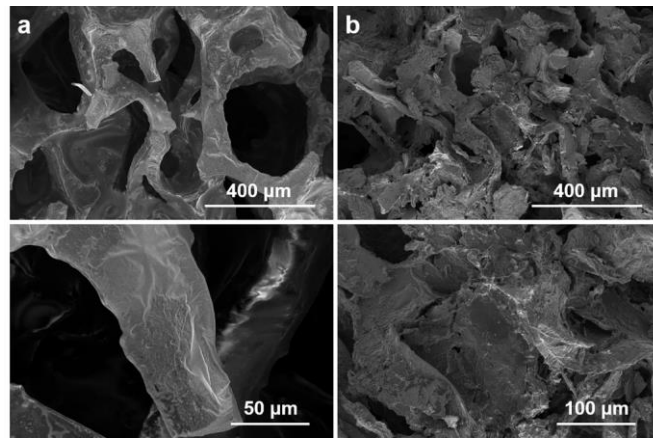

**Fig. S7** Cross-section SEM images of (a) MGP100 composite foams and (b) MGP100-3 composite foams and their corresponding magnification images

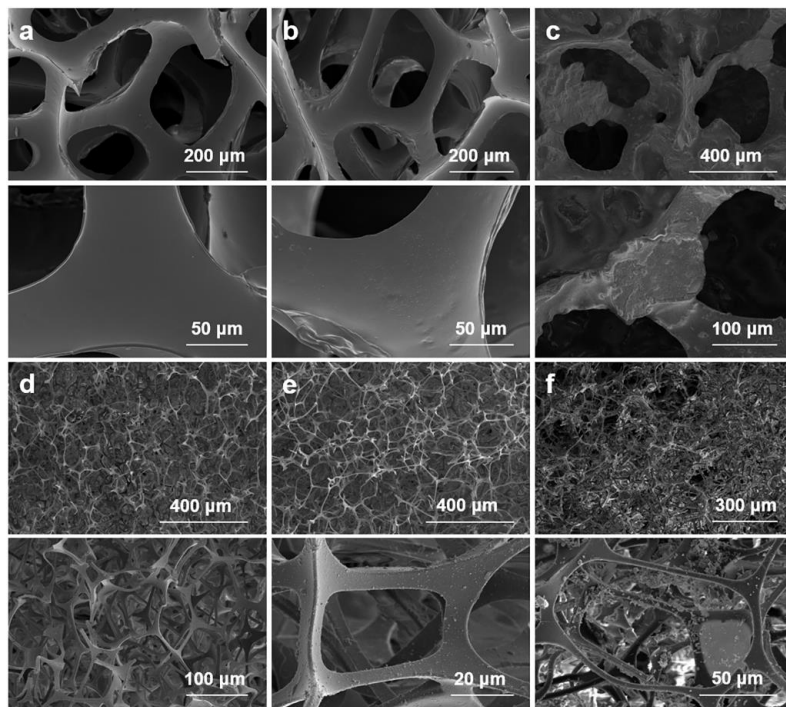

**Fig. S8** SEM images of (a) PU, (b) PU@PDA, (c) MGP100 composite foams and (d) melamine foam (MF), (e) MF@PDA, (f) MG/ MF@PDA composite foams

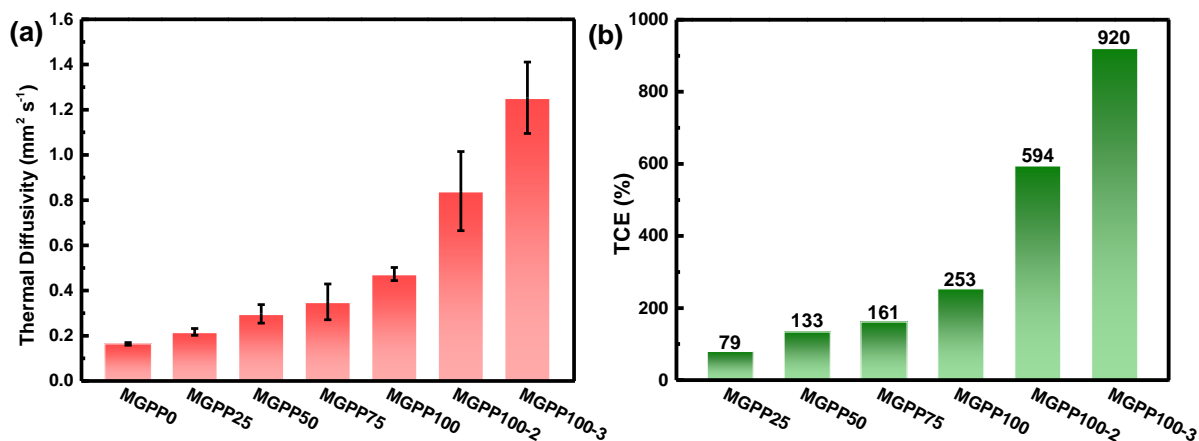

**Fig. S9** (a) Through-plane thermal diffusivity of MGPP composites. (b) TCE of MGPP composites compared with MGPP0

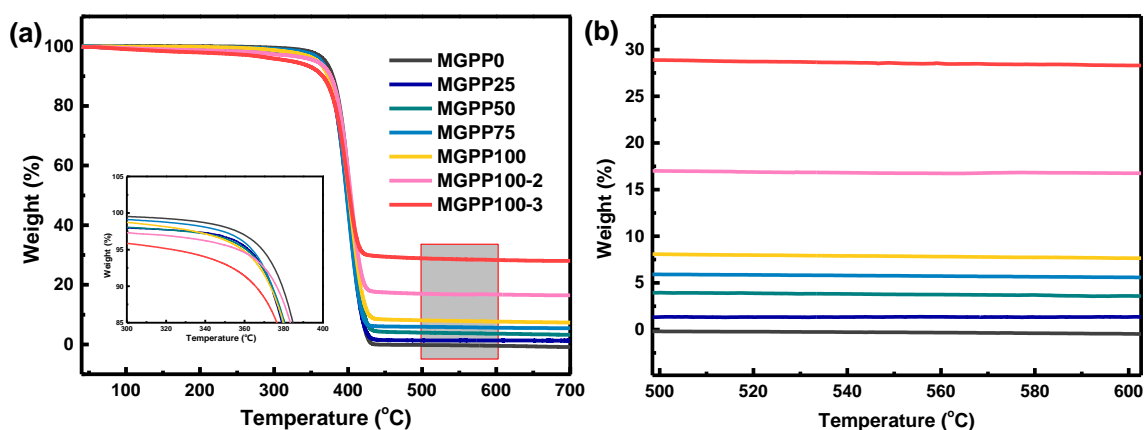

**Fig. S10** TGA analysis of MGPP composites

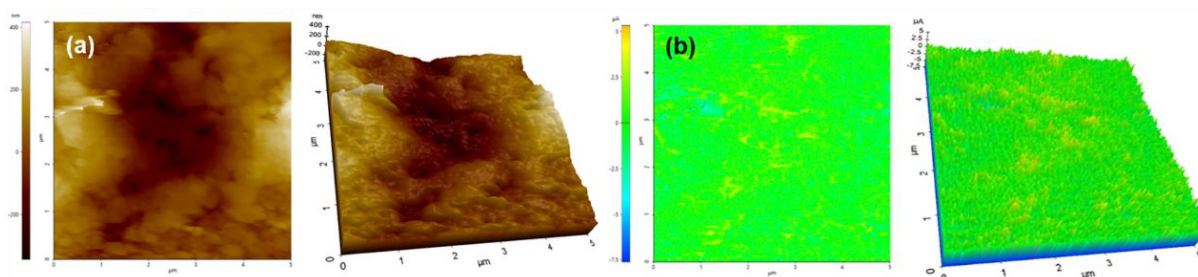

**Fig. S11** (a) Topography and (b) SThM and their corresponding 3D images of MGPP0. The scan size is  $5 \times 5 \mu\text{m}$

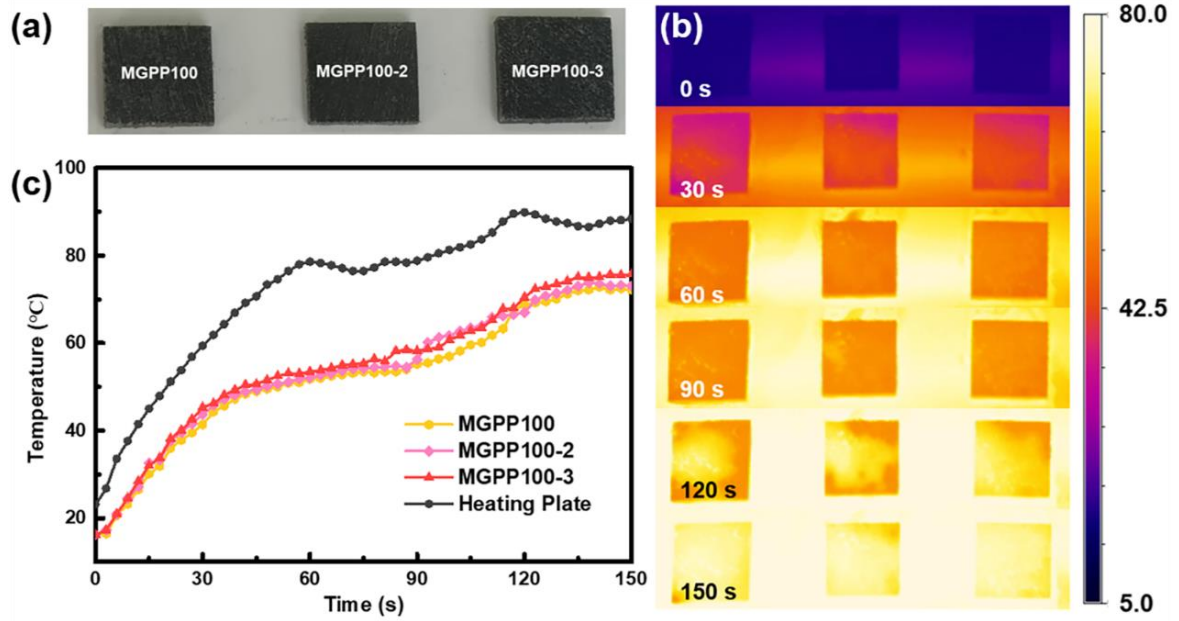

**Fig. S12** (a) Optical image, (b) infrared thermal image, and (c) surface temperature variation curve of the thermal conductive MGPP samples

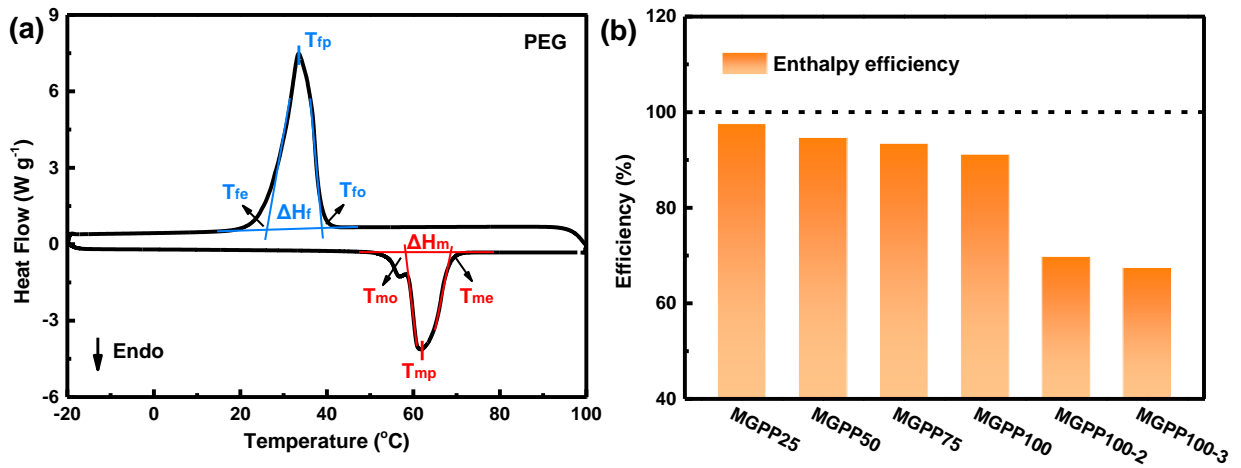

**Fig. S13** (a) DSC curve of PEG. (b) Enthalpy efficiency of MGPP composites

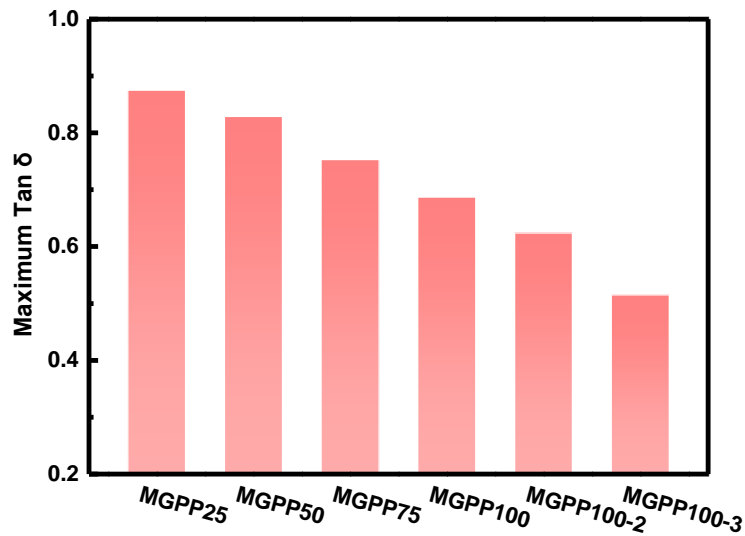

**Fig. S14** The maximum tan δ for the MGPP composites

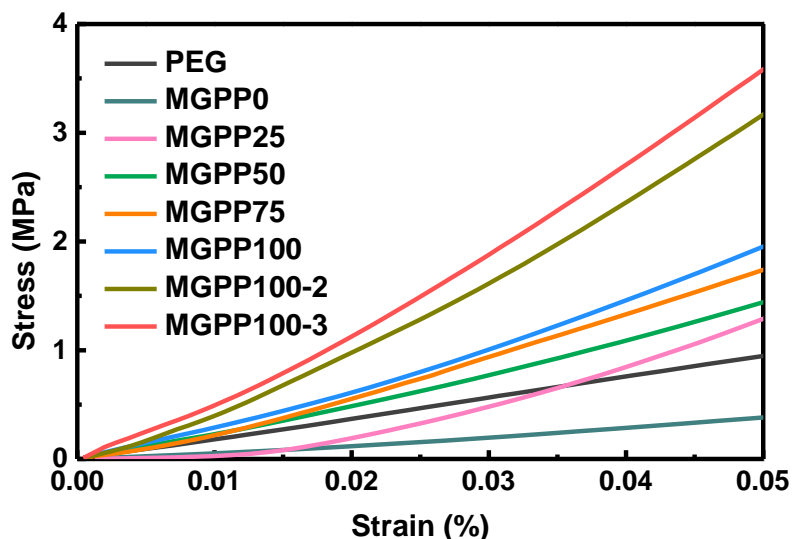

**Fig. S15** The enlarged strain-stress curve at the range of 0-0.05% strain

**Table S1** DSC data

| Sample    | $T_m$ (°C) | $T_c$ (°C) | $\Delta H_m$ (J g <sup>-1</sup> ) | $\Delta H_c$ (J g <sup>-1</sup> ) |
|-----------|------------|------------|-----------------------------------|-----------------------------------|
| PEG       | 61.83      | 31.06      | 191.61                            | 192.58                            |
| MGPP0     | 62.07      | 34.97      | 189.43                            | 191.25                            |
| MGPP25    | 62.39      | 36.09      | 186.94                            | 189.97                            |
| MGPP50    | 62.29      | 35.44      | 181.46                            | 188.21                            |
| MGPP75    | 62.41      | 35.89      | 179.07                            | 183.56                            |
| MGPP100   | 61.88      | 36.19      | 174.72                            | 177.90                            |
| MGPP100-2 | 61.71      | 37.06      | 133.74                            | 133.63                            |
| MGPP100-3 | 61.56      | 37.51      | 129.32                            | 130.25                            |

**Table S2** DSC data

| Samples   | $T_{mo}$ (°C) | $T_{me}$ (°C) | $T_{co}$ (°C) | $T$ (°C) |
|-----------|---------------|---------------|---------------|----------|
| PEG       | 56.66         | 65.46         | 37.38         | 24.57    |
| MGPP0     | 58.68         | 68.11         | 40.44         | 24.41    |
| MGPP25    | 58.12         | 66.57         | 39.93         | 28.67    |
| MGPP50    | 58.18         | 66.41         | 37.09         | 27.25    |
| MGPP75    | 58.29         | 66.69         | 38.13         | 27.96    |
| MGPP100   | 58.32         | 66.71         | 39.37         | 29.53    |
| MGPP100-2 | 58.31         | 66.51         | 38.34         | 29.29    |
| MGPP100-3 | 58.04         | 64.08         | 38.76         | 30.85    |

Where  $\Delta H_m$  is the melting enthalpy,  $T_m$  is the melting temperature,  $\Delta H_c$  is the crystallization enthalpy, and  $T_c$  is the crystallization temperature. The subscript “o” indicates the starting point, “p” indicates the peak point, and “e” indicates the endpoint.

**Movie S1** The rapid shape recovery of MGPP100-3 composite spline.

**Movie S2** The slow shape recovery of MGPP100-3 composite spline.

Both **Movie S1** and **S2** are processed at 10× speed.
